# Supplementary material for: A zwitterionic ligand-based water-stable metal–organic framework showing photochromic and Cr(vi) removal properties
Source: Royal Society of Chemistry journal article supplement (doi:10.1039/c9dt04679h), 2020-01-01
Supplement: c9dt04679h1.pdf [file c9dt04679h1.pdf]

## **A Zwitterionic Ligand-Based Water Stable Metal-Organic Framework Showing Photochromic and Cr(VI) Removal Properties**

Chenghui Zhang,<sup>a,b</sup> Huaizhong Shi,<sup>a</sup> Yan Yan,<sup>a</sup> Libo Sun,<sup>c</sup> Yu Ye,<sup>a</sup> Yizhong Lu,<sup>b</sup> Zhiqiang Liang<sup>a\*</sup> and Jiyang Li<sup>a\*</sup>

<sup>a</sup> State Key Lab of Inorganic Synthesis and Preparative Chemistry, Jilin University, Changchun 130012, P. R. China. E-mail: lijyang@jlu.edu.cn, liangzq@jlu.edu.cn.

<sup>b</sup> School of Materials Science and Engineering, University of Jinan, Jinan 250022, P. R. China.

<sup>c</sup> School of Chemical and Biomedical Engineering, Nanyang Technological University, 62 Nanyang Drive, 637459, Singapore.

**Table S1.** Crystal Data and Structure Refinement for **1**.

|                                      |                                                                                                                           |
|--------------------------------------|---------------------------------------------------------------------------------------------------------------------------|
| Empirical formula                    | $C_{36}H_{23}In_3N_4O_{12}$                                                                                               |
| Formula weight                       | 1048.04                                                                                                                   |
| Temperature                          | 193(2) K                                                                                                                  |
| Wavelength                           | 0.71073 Å                                                                                                                 |
| Crystal system                       | Trigonal                                                                                                                  |
| Space group                          | R-3m                                                                                                                      |
| Unit cell dimensions                 | $a = 15.2848(7)$ Å $\alpha = 90^\circ$<br>$b = 15.2848(7)$ Å $\beta = 90^\circ$<br>$c = 56.084(3)$ Å $\gamma = 120^\circ$ |
| Volume                               | 11347.2(12) Å <sup>3</sup>                                                                                                |
| Z                                    | 9                                                                                                                         |
| Density (calculated)                 | 1.380 mg/m <sup>3</sup>                                                                                                   |
| Absorption coefficient               | 1.411 mm <sup>-1</sup>                                                                                                    |
| F(000)                               | 4590                                                                                                                      |
| Crystal size                         | 0.120 × 0.110 × 0.080 mm <sup>3</sup>                                                                                     |
| Theta range for data collection      | 2.179 to 28.298°.                                                                                                         |
| Index ranges                         | -20 ≤ h ≤ 20, -20 ≤ k ≤ 14, -74 ≤ l ≤ 74                                                                                  |
| Reflections collected                | 37905                                                                                                                     |
| Independent reflections              | 3459 [ $R_{(int)} = 0.0347$ ]                                                                                             |
| Completeness to theta = 25.242°      | 98.5 %                                                                                                                    |
| Absorption correction                | Semi-empirical from equivalents                                                                                           |
| Max. and min. transmission           | 0.0962 and 0.0682                                                                                                         |
| Refinement method                    | Full-matrix least-squares on F <sup>2</sup>                                                                               |
| Data / restraints / parameters       | 3459 / 198 / 186                                                                                                          |
| Goodness-of-fit on F <sup>2</sup>    | 1.136                                                                                                                     |
| Final R indices [ $I > 2\sigma(I)$ ] | $R_1 = 0.0275$ , $wR_2 = 0.0793$                                                                                          |
| R indices (all data)                 | $R_1 = 0.0285$ , $wR_2 = 0.0801$                                                                                          |
| Extinction coefficient               | n/a                                                                                                                       |
| Largest diff. peak and hole          | 0.533 and -0.717 e.Å <sup>-3</sup>                                                                                        |

Note for the final formula of compound **1**: Because bromine atoms couldn't be located by single crystal X-ray data and the framework is neutral, while EDX mapping image and XPS analysis show that there exist bromine atoms in this material, we speculate that bromine is not in the structure of **1**, but might be simply adsorbed on crystal surface of the material containing positively charged pyridinium nitrogen from linkers by electrostatic interaction. Besides, the solvents are insignificant for our research works. So the final formula of compound **1** is identified as  $[\text{In}_3(\text{ipbp})_2(\mu_2\text{-OH})(\mu_2\text{-O})_3]$  based on crystallographic data like previously reports (*Chem. Sci.*, 2019, **10**, 1186; *J. Am. Chem. Soc.*, 2019, **141**, 2900).

**Table S2.** Selected bond lengths [Å] and angles [°] for **1**.

|                     |            |                     |            |
|---------------------|------------|---------------------|------------|
| In(1)-O(3)          | 2.092(2)   | In(2)-O(3)          | 2.084(3)   |
| In(1)-O(4)#2        | 2.1007(9)  | In(2)-O(1)#3        | 2.156(2)   |
| In(1)-O(4)          | 2.1007(9)  | In(2)-O(1)#5        | 2.156(2)   |
| In(1)-O(2)#3        | 2.180(2)   | In(2)-O(1)          | 2.156(2)   |
| In(1)-O(2)          | 2.180(2)   | In(2)-O(1)#4        | 2.156(2)   |
| In(1)-N(1)          | 2.266(2)   | O(3)-H(3M)          | 0.9356     |
| In(2)-O(3)#4        | 2.084(3)   |                     |            |
| O(2)-C(1)-O(1)      | 126.9(2)   | O(4)-In(1)-O(2)     | 88.43(10)  |
| O(2)-C(1)-C(2)      | 116.5(2)   | O(2)#3-In(1)-O(2)   | 84.69(14)  |
| O(1)-C(1)-C(2)      | 116.5(2)   | O(3)-In(1)-N(1)     | 168.18(11) |
| C(3)-C(2)-C(4)      | 120.0(3)   | O(4)#2-In(1)-N(1)   | 90.56(19)  |
| C(3)-C(2)-C(1)      | 120.2(2)   | O(4)-In(1)-N(1)     | 90.95(18)  |
| C(4)-C(2)-C(1)      | 119.7(2)   | O(2)#3-In(1)-N(1)   | 81.23(16)  |
| C(2)#6-C(3)-C(2)    | 120.1(3)   | O(2)-In(1)-N(1)     | 81.58(18)  |
| C(2)#6-C(3)-H(3A)   | 119.9      | O(3)#4-In(2)-O(3)   | 180.00(5)  |
| C(2)-C(3)-H(3A)     | 120.0      | O(3)#4-In(2)-O(1)#3 | 88.51(7)   |
| C(5)-C(4)-C(2)      | 119.2(3)   | O(3)-In(2)-O(1)#3   | 91.48(7)   |
| C(5)-C(4)-H(4A)     | 120.5      | O(3)#4-In(2)-O(1)#5 | 91.49(7)   |
| C(2)-C(4)-H(4A)     | 120.4      | O(3)-In(2)-O(1)#5   | 88.52(7)   |
| C(4)#6-C(5)-C(4)    | 121.5(4)   | O(1)#3-In(2)-O(1)#5 | 180.00(12) |
| C(4)#6-C(5)-N(2)#1  | 119.1(5)   | O(3)#4-In(2)-O(1)   | 88.52(7)   |
| C(4)-C(5)-N(2)#1    | 119.3(6)   | O(3)-In(2)-O(1)     | 91.48(7)   |
| O(3)-In(1)-O(4)#2   | 97.01(9)   | O(1)#3-In(2)-O(1)   | 89.96(14)  |
| O(3)-In(1)-O(4)     | 97.01(9)   | O(1)#5-In(2)-O(1)   | 90.04(14)  |
| O(4)#2-In(1)-O(4)   | 97.52(14)  | O(3)#4-In(2)-O(1)#4 | 91.49(7)   |
| O(3)-In(1)-O(2)#3   | 89.89(7)   | O(3)-In(2)-O(1)#4   | 88.52(7)   |
| O(4)#2-In(1)-O(2)#3 | 88.43(10)  | O(1)#3-In(2)-O(1)#4 | 90.04(14)  |
| O(4)-In(1)-O(2)#3   | 170.24(10) | O(1)#5-In(2)-O(1)#4 | 89.96(14)  |
| O(3)-In(1)-O(2)     | 89.89(7)   | O(1)-In(2)-O(1)#4   | 180.0      |
| O(4)#2-In(1)-O(2)   | 170.24(9)  |                     |            |

Symmetry transformations used to generate equivalent atoms:

#1  $y+1/3, -x+y+2/3, -z+2/3$     #2  $-x+y, -x+1, z$     #3  $-y+1, -x+1, z$

#4  $-x+1, -y+1, -z+1$     #5  $y, x, -z+1$     #6  $-x+y+1, y, z$

**Table S3.** Comparison of Cr(VI) adsorption ability of compound **1** with selected MOFs.

| Absorbent             | Maximum Capacity (mg g <sup>-1</sup> ) | References                                               |
|-----------------------|----------------------------------------|----------------------------------------------------------|
| UTSA-74               | 790                                    | <i>Angew. Chem. Int. Ed.</i><br>2017, <b>56</b> , 16376. |
| Zn-MOF-74             | 750                                    |                                                          |
| MOR-2                 | 193.7                                  | <i>J. Mater. Chem. A</i><br>2017, <b>5</b> , 14707.      |
| MOR-2-HA              | 162.8                                  |                                                          |
| TMU-30                | 145                                    | <i>Inorg. Chem.</i> 2016,<br><b>55</b> , 5507.           |
| MOR-1-HA              | 108.2-124.6                            | <i>Chem. Sci.</i> 2016, <b>7</b> ,<br>2427.              |
| MOR-1 (protonated)    | 123.6-114                              |                                                          |
| MOR-1 (nonprotonated) | 117.4-139.5                            |                                                          |
| Cu-MOF                | 107                                    | <i>Chem. Eur. J.</i> 2018,<br><b>24</b> , 2718.          |
| ABT-2ClO <sub>4</sub> | 102.9                                  | <i>Angew. Chem. Int. Ed.</i><br>2013, <b>52</b> , 13769. |
| Ag-MOF                | 99.6                                   | <i>Chem. Commun.</i><br>2017, <b>53</b> , 9206-9209.     |
| 1-SO <sub>4</sub>     | 79.9                                   | <i>Angew. Chem. Int. Ed.</i><br>2016, <b>55</b> , 7811.  |
| 1-NO <sub>3</sub> -OH | 74.5                                   | <i>Dalton Trans.</i> , 2018,<br><b>47</b> , 9103.        |
| <b>1</b>              | <b>74.4</b>                            | <b>This work</b>                                         |
| FIR-54                | 49.6                                   | <i>Chem. Mater.</i> , 2015,<br><b>27</b> , 205.          |
| JLU-MOF50             | 44.3                                   | <i>J. Mater. Chem. A</i> ,<br>2018, <b>6</b> , 6363.     |
| NU-1000               | 36.1                                   | <i>Inorg. Chem.</i> , 2017,<br><b>56</b> , 14178.        |
| FIR-53                | 35.7                                   | <i>Chem. Mater.</i> , 2015,<br><b>27</b> , 205.          |
| SLUG-35               | 30.7                                   | <i>Chem. Mater.</i> , 2013,<br><b>25</b> , 647.          |
| 1-ClO <sub>4</sub>    | 28.2                                   | <i>Chem. Commun.</i> ,<br>2012, <b>48</b> , 8231.        |
| SLUG-21               | 26.9                                   | <i>J. Am. Chem. Soc.</i> ,<br>2011, <b>133</b> , 11110.  |

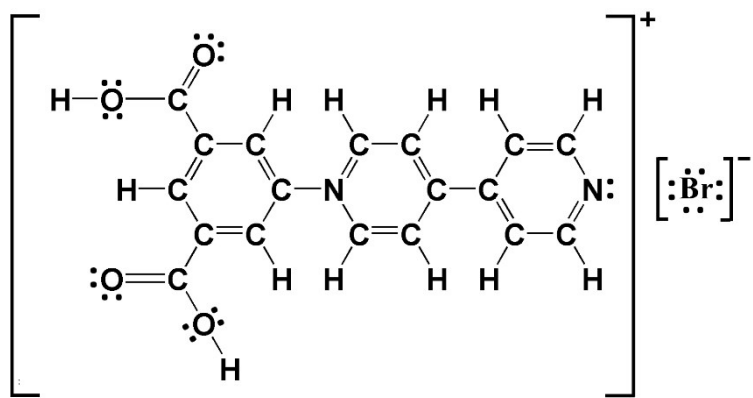

**Fig. S1** Illustration of Lewis structure of  $\text{H}_2(\text{ipbp})\text{Br}$  linker.

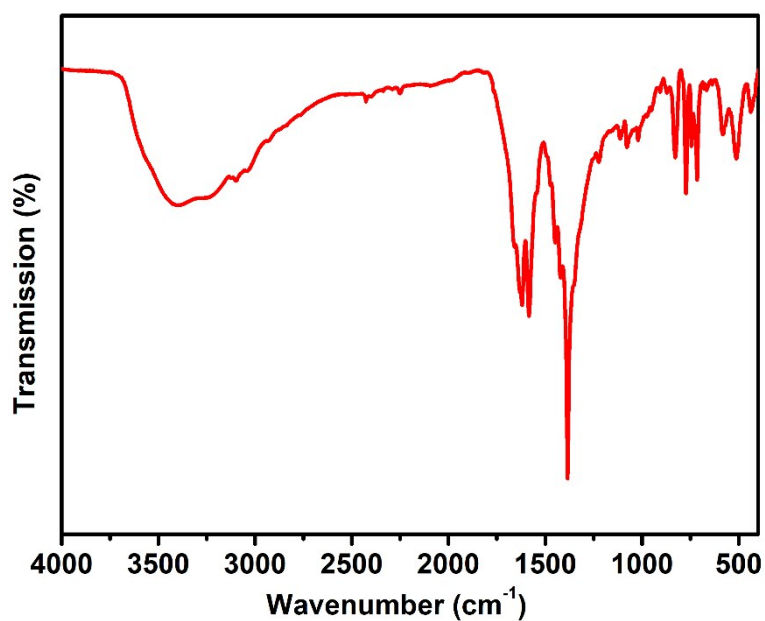

**Fig. S2** IR spectrum of compound **1**. The absence of absorption around  $1700\text{ cm}^{-1}$  confirms that the carboxylic groups ( $-\text{COOH}$ ) in  $\text{H}_2(\text{ipbp})\text{Br}$  ligands are completely deprotonated and exist as  $-\text{COO}^-$ , thus giving the stretch vibrations around  $1619\text{ cm}^{-1}$  and  $1385\text{ cm}^{-1}$ .<sup>1, 2</sup> Moreover, the characteristic absorption around  $1630\text{ cm}^{-1}$  confirms the existence of  $\text{C}=\text{N}$  and  $\text{C}=\text{C}$  stretching vibrations of the pyridinium group in compound **1**.<sup>2</sup>

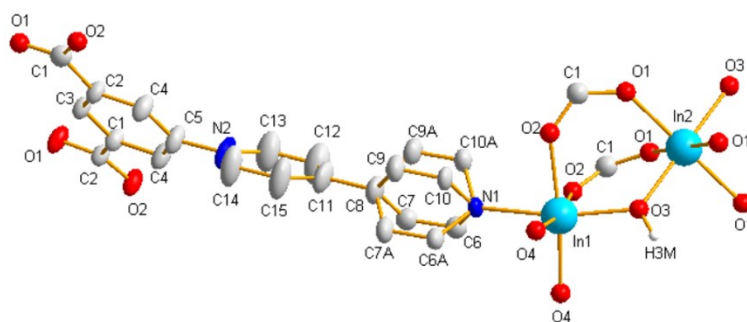

**Fig. S3** The coordination environment of **1**. The hydrogen atoms from linkers are omitted for clarity.



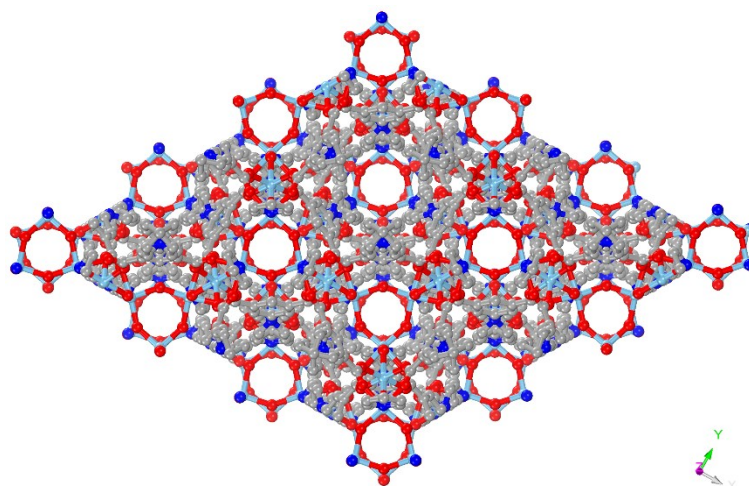

**Fig. S4** The 3D framework of compound **1**.

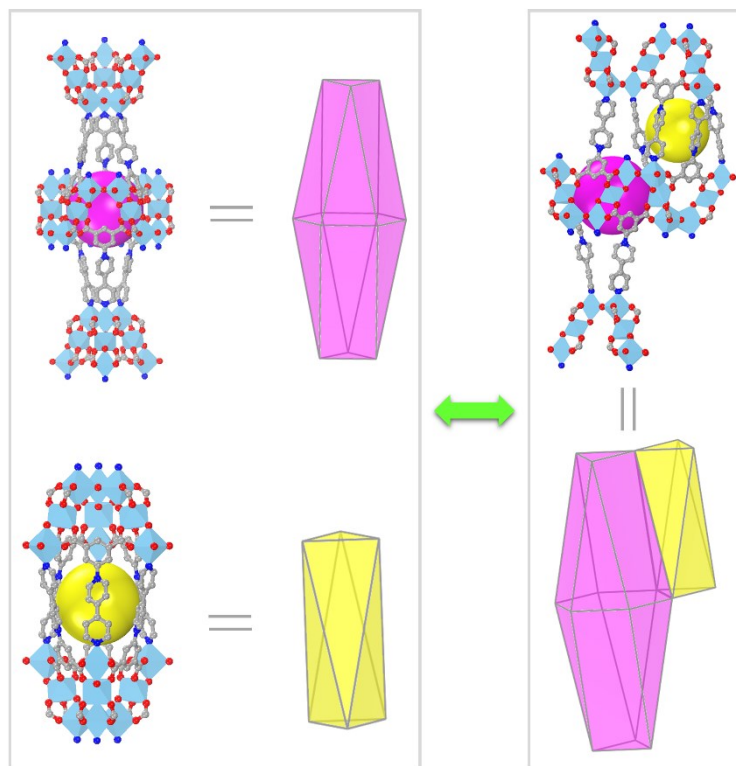

**Fig. S5** View of two different cages in compound **1**.

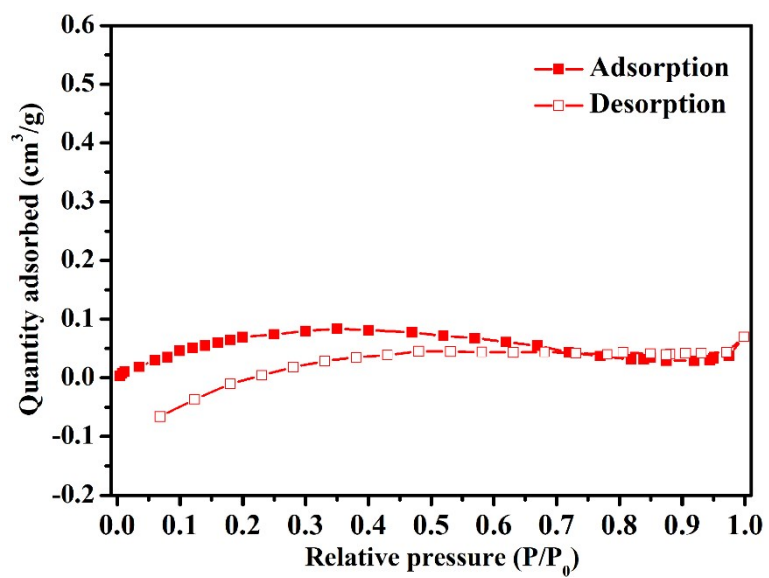

**Fig. S6** N<sub>2</sub> adsorption-desorption isotherms of compound **1** at 77 K.

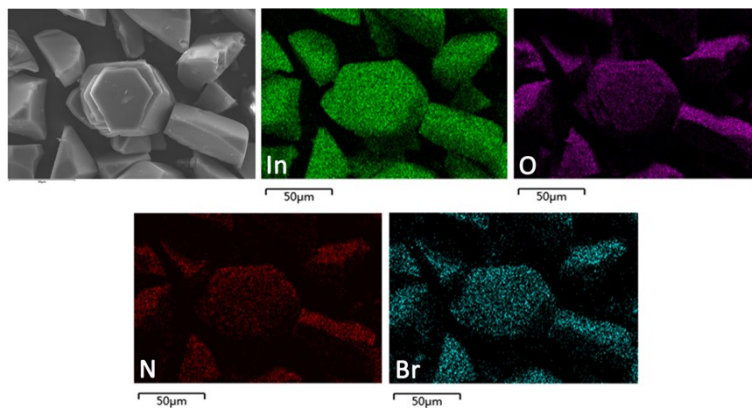

**Fig. S7** SEM image and elemental mapping images of compound **1**.

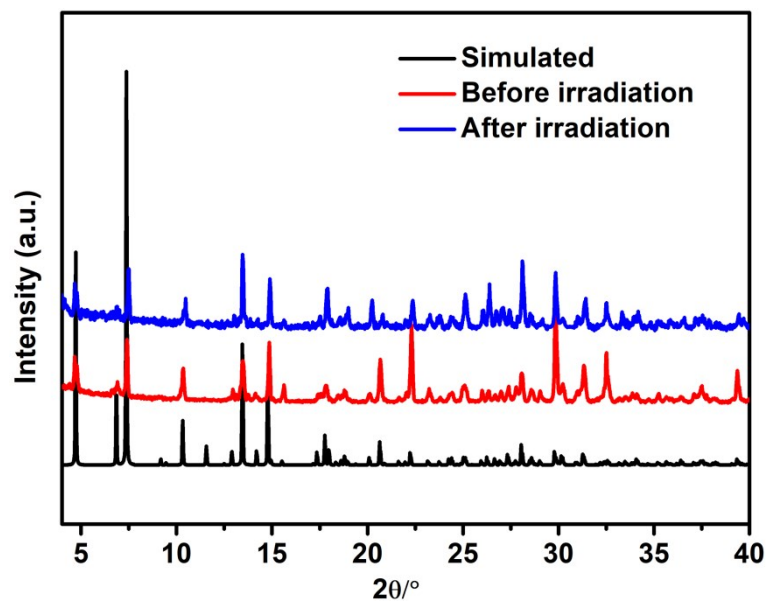

**Fig. S8** PXRD patterns of simulated, before and after irradiation of compound **1**.

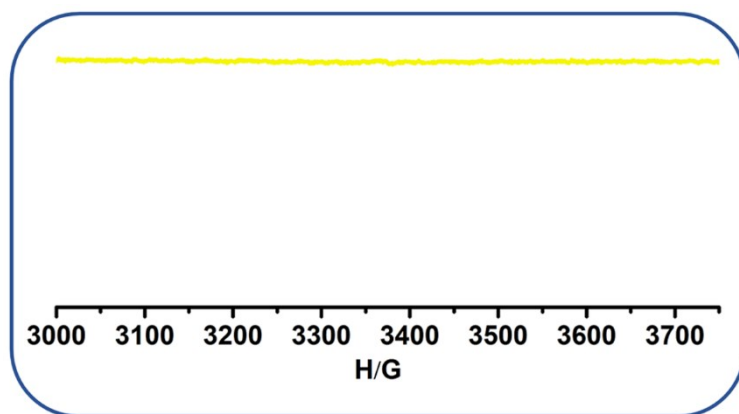

**Fig. S9** EPR signal of compound **1** after decolored.

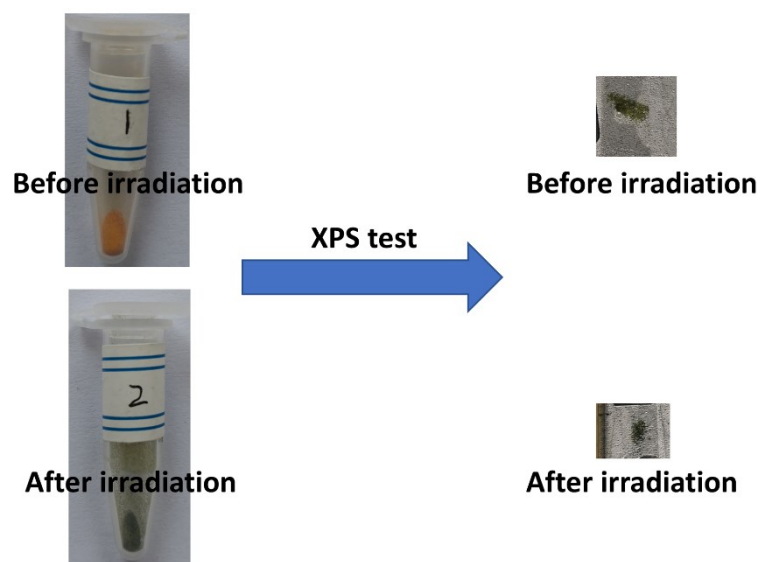

**Fig. S10** Photographs showing crystal colors of compound **1** after irradiation and XPS test.

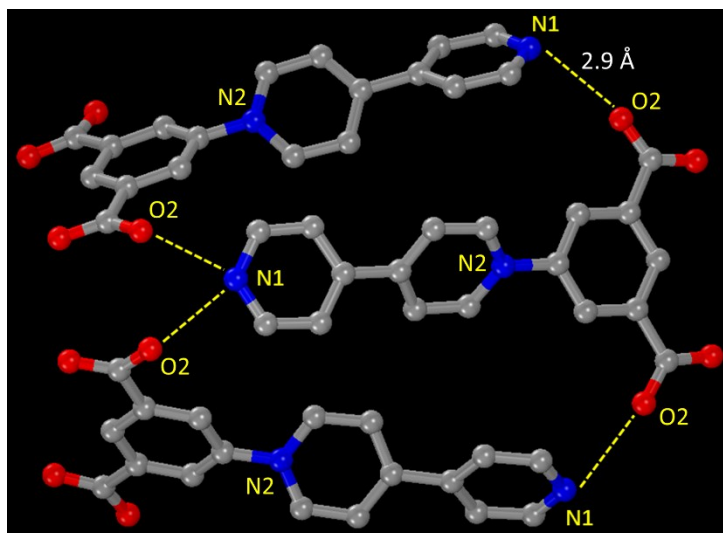

**Fig. S11** The electron transfer pathways between the oxygen atom of carboxylate and nitrogen atom of bipyridinium units from adjacent ligands in the structure of compound **1**.



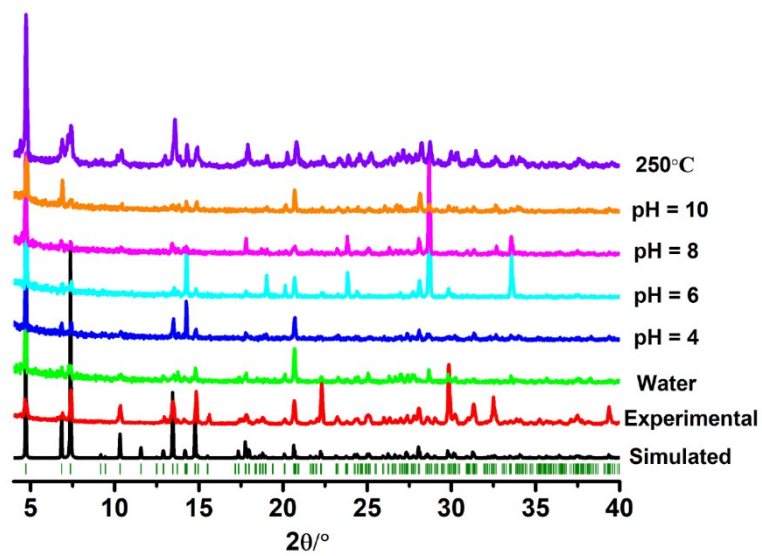

**Fig. S12** PXR D patterns of compound **1** after immersed in water for one week, in aqueous solution with various pH for 48 h or heated at 250 °C for 10 min.

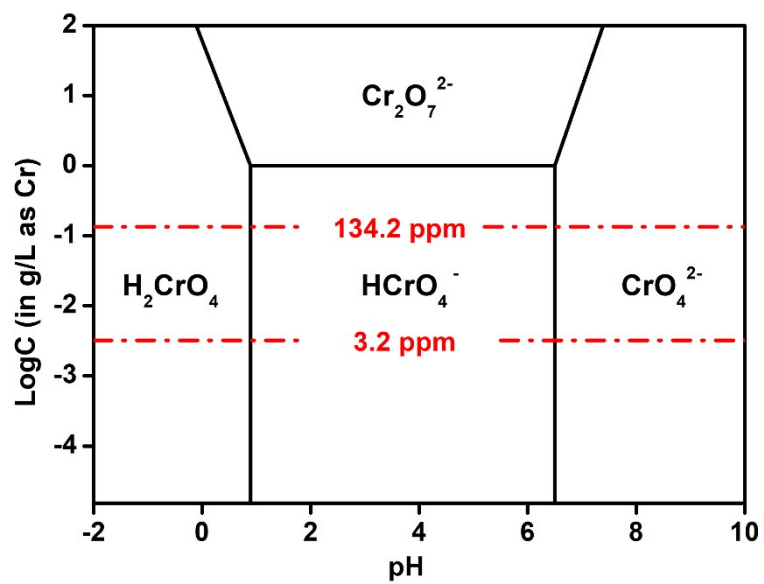

**Fig. S13** The predominance diagram showing the relative distribution of different Cr(VI) species in water as a function of pH and total Cr(VI) concentration.

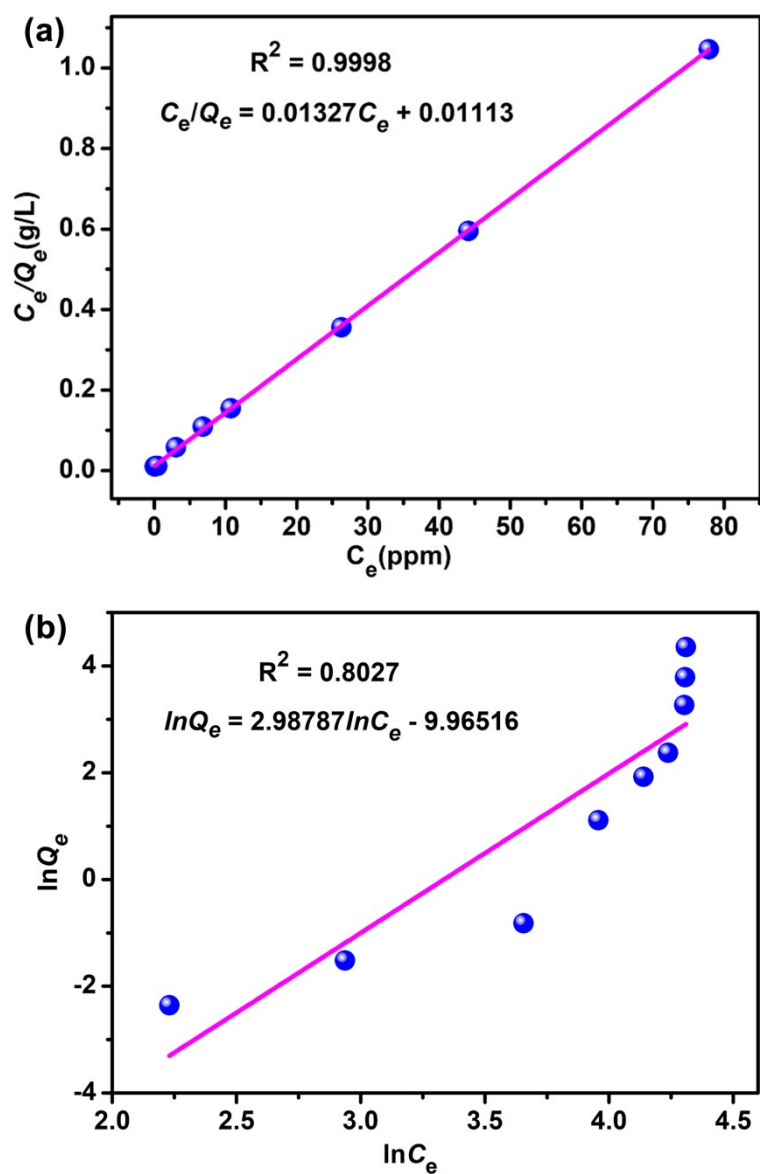

**Fig. S14** (a) Langmuir isotherm and (b) Freundlich isotherm fitting model for Cr(VI) removal by compound **1** according to Eq. (1) and (2)<sup>3</sup>, respectively:

$$C_e/Q_e = C_e/Q_m + 1/(K_L \cdot Q_m) \quad (1)$$

$$\ln Q_e = \ln K_F + 1/n \ln C_e \quad (2)$$

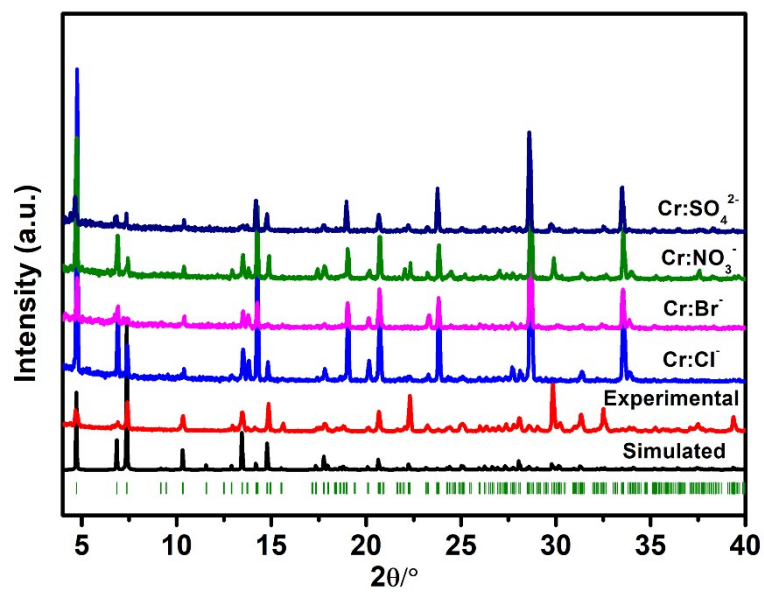

**Fig. S15** PXR D patterns of compound **1** before and after Cr(VI) adsorption in the presence of differently competitive ions.

The release of Cr(VI) from Cr(VI)@**1** was done in the following experiments. 10 mg of compound **1** was immersed in 30 mL of Cr(VI) aqueous solutions (134.2 ppm) under stirring condition for 48 h to obtain sample of Cr(VI)@**1**, which was separated by centrifugation and washed by water for three times. Then the obtained dried sample was immersed in 30 mL water containing 200-fold molar amounts of Br<sup>-</sup> (relative to the absorbed Cr(VI)). After 12 h and 24 h, 2 mL of the mixture was taken out, respectively. Then the supernatant was separated by centrifugation and analyzed by ICP, and the solid sample was washed by water for three times and then analyzed by PXRD (Fig. S16).

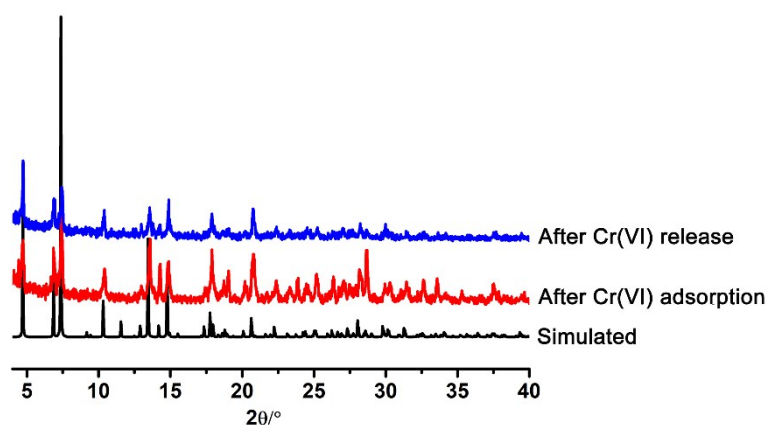

**Fig. S16** PXRD patterns of compound **1** after Cr(VI) adsorption and release.

## References

1. C. Q. Zhang, L. B. Sun, Y. Yan, J. Y. Li, X. W. Song, Y. L. Liu and Z. Q. Liang, *Dalton Trans.*, 2015, **44**, 230.
2. J.-K. Sun, P. Wang, C. Chen, X.-J. Zhou, L.-M. Wu, Y.-F. Zhang and J. Zhang, *Dalton Trans.*, 2012, **41**, 13441.
3. M. T. Ge; H. Z Liu. *J. Mater. Chem. A*, 2016, **4**, 16714.
